# Supplementary material
Source: publisher site journal article supplement (https://www.dovepress.com/article/337093)
Supplement: Supplementary file 1 [file get_supplementary_file.php]

Supplementary data

Chitosan-coated-PLGA nanoparticles enhance the antitumor and antimetastatic activity of Stattic, a STAT3 dimerization blocker

Stephanie Sally Fong1#, Yiing Yee Foo1#, Wen Shang Saw2, Bey Fen Leo3, Yin Yin Teo4, Ivy Chung1, Boon Tong Goh5, Misni Misran4, Toyoko Imae6, Chia-Ching Chang7,8,9,10, 11*, Lip Yong Chung2, Lik Voon Kiew1,7 *

1 Department of Pharmacology, Faculty of Medicine, University of Malaya, Kuala Lumpur 50603, Malaysia

2 Department of Pharmaceutical Chemistry, Faculty of Pharmacy, University of Malaya, Kuala Lumpur 50603, Malaysia

3 Faculty of Medicine, University of Malaya, Kuala Lumpur 50603, Malaysia

4 Department of Chemistry, Faculty of Science, University of Malaya, Kuala Lumpur 50603, Malaysia

5 Low Dimensional Materials Research Center, Department of Physics, Faculty of Science, University of Malaya, Kuala Lumpur 50603, Malaysia

6 Graduate Institute of Applied Science and Technology, National Taiwan University of Science and Technology, Taipei 10607, Taiwan

7 Department of Biological Science and Technology, College of Biological Science and Technology, National Yang Ming Chiao Tung University, Hsinchu 30068, Taiwan

8 Center for Intelligent Drug Systems and Smart Bio-devices (IDS2B), National Yang Ming Chiao Tung University, Hsinchu 30050, Taiwan

9 Department of Electrophysics, National Yang Ming Chiao Tung University, Hsinchu 30010, Taiwan

10 Institute of Physics, Academia Sinica, Nankang, Taipei, Taiwan

11 Taiwan-Malaysia Semiconductor and Biomedical Oversea Science and Technology Innovation Center, National Yang Ming Chiao Tung University, Hsinchu 30010, Taiwan

#These authors contributed equally to this work

Correspondences: Lik Voon Kiew; Chia-Ching Chang

Email [lvkiew@um.edu.my](mailto:lvkiew@um.edu.my); ccchang01@ nycu.edu.tw


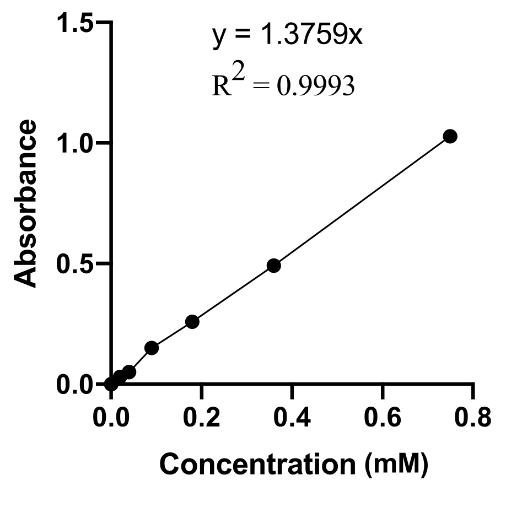


**Figure S1** Calibration curve for drug loading and entrapment efficiency determination

**Notes:** The concentration of Stattic was then determined by using a standard curve derived from the absorbance of solution with a known concentration of Stattic.


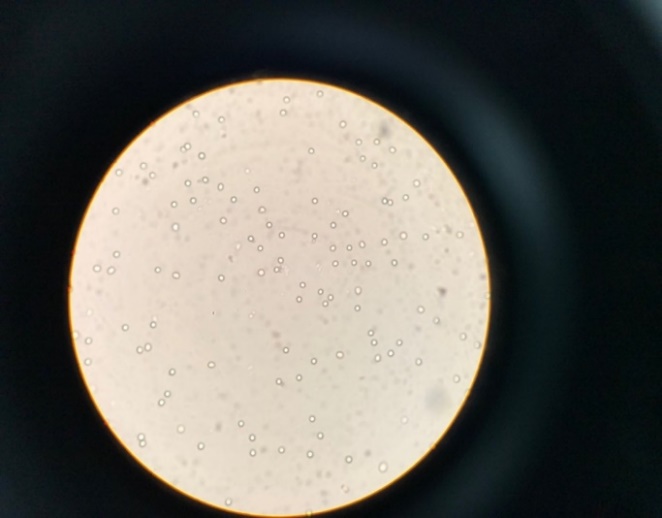

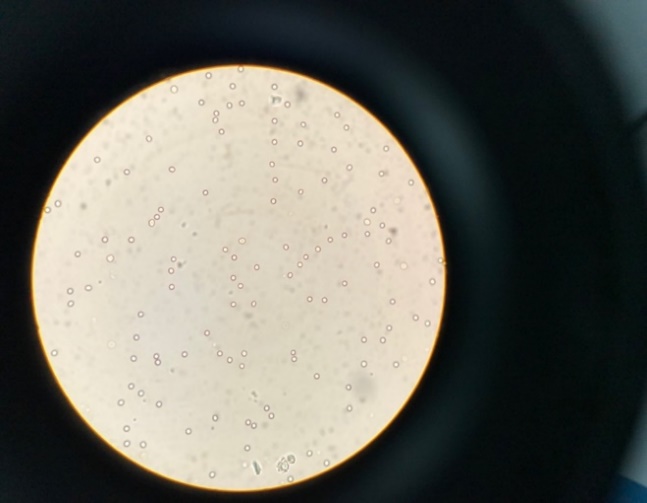

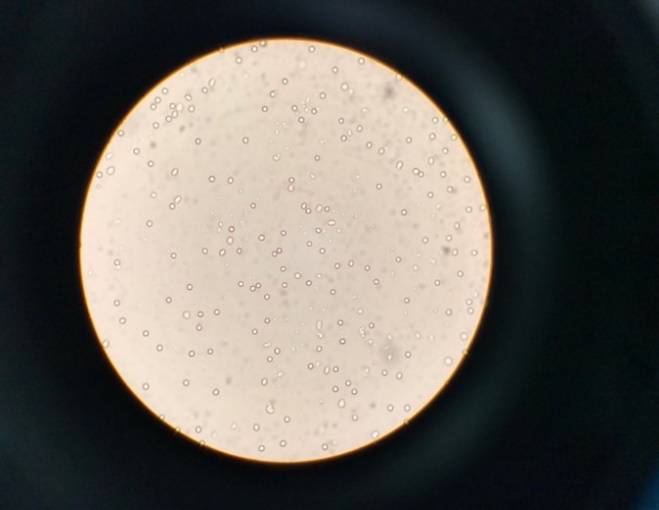


**B**

**A**

**C**

**Figure S2** Red blood cell aggregation test.

**Notes:** Microscopic images of red blood cells (RBC) at 100 × magnification. No RBC aggregation was observed after treatment with (A) Blank PLGA, (B) S@PLGA, and (C) S@C-PLGA NPs for 2 h, at 37°C and 97% humidity.

**Abbreviations:** RBC, red blood cells; NPS, nanoparticles

**Figure S3** Percentage of hemolysis after the incubation of different concentrations of nanoparticles in 2% red blood cells.

**Notes:** 37°C and 97% humidity for 5 h. Triton X-100 (1% v/v) and blank PBS (100 µl) were used as positive and negative controls, respectively.

**Abbreviations**: PBS, phosphate buffer saline

**Figure S4** The percentage of cell viability for 4T1 after treated 24 h.

**Notes**: Data represent mean ± SEM from three independent experiments.


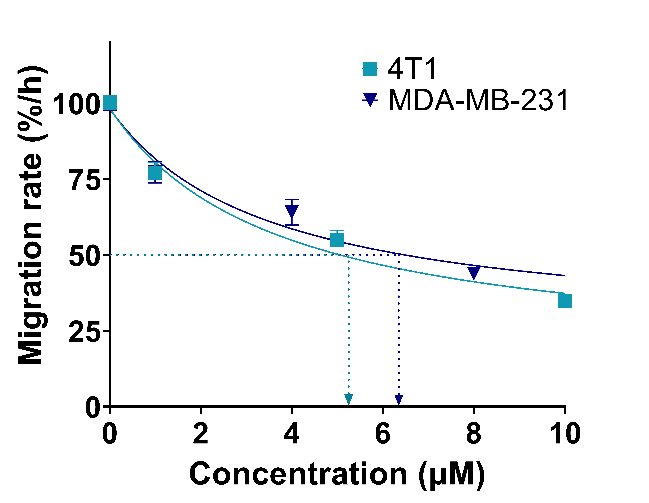


**Figure S5** The normalized migration rate of MDA-MB-231 and 4T1 cells after treated with Stattic of different concentrations for 24 h.

**Notes:** Data represent mean ± SEM from three independent experiments.


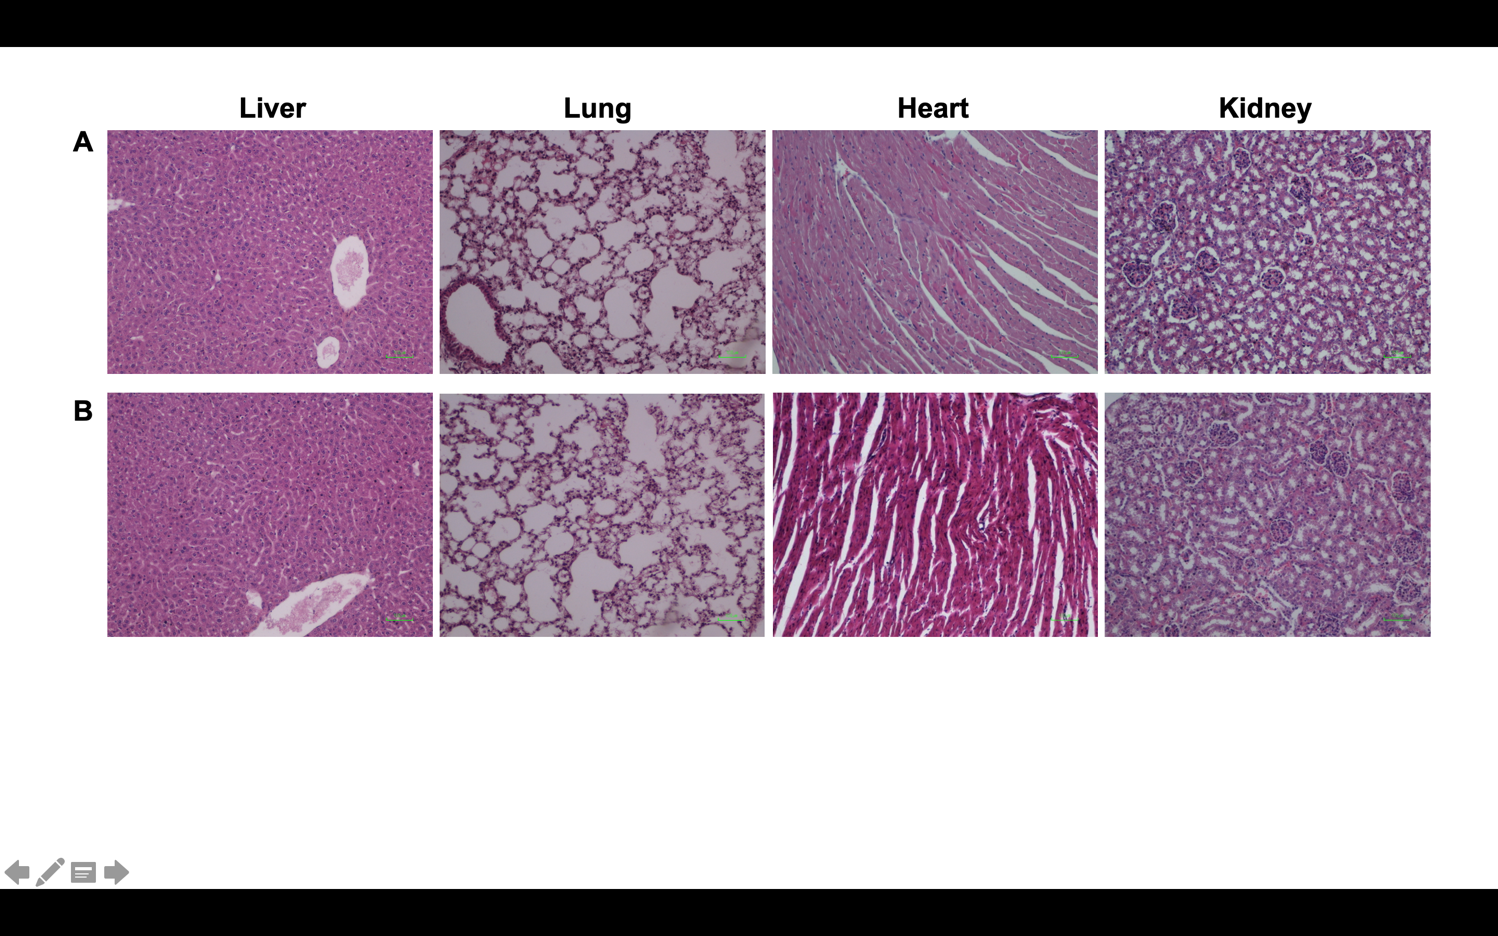


**Figure S6** *In vivo* antimetastatic effects of Stattic and S@C-PLGA NPs.

**Notes:** Representative liver, lung, heart and kidney of healthy mice injected with 24 mg/kg Stattic **(A)** and S@C-PLGA NPs (24 mg Stattic eqv./kg) **(B)** No signs of toxicity were seen in the both groups mice.
